# Supplementary material for: Photofragmentation spectroscopy of cold protonated aromatic amines in the gas phase
Source: Royal Society of Chemistry journal article supplement (doi:10.1039/c3cp54736a), 2014-01-01
Supplement: c3cp54736a.pdf [file c3cp54736a.pdf]

Cite this: DOI: 10.1039/c0xx00000x

www.rsc.org/xxxxxx

ARTICLE TYPE

## Photofragmentation spectroscopy of cold protonated aromatic amines in the gas phase: Supplementary Information

Géraldine Féraud,<sup>a</sup> Michel Broquier,<sup>b,c</sup> Claude Dedonder-Lardeux,<sup>a</sup> Gilles Grégoire,<sup>d</sup> Satchin Soorkia<sup>b</sup> and Christophe Juvet<sup>\*a</sup>

Received (in XXX, XXX) Xth XXXXXXXXXX 20XX, Accepted Xth XXXXXXXXXX 20XX

DOI: 10.1039/b000000x

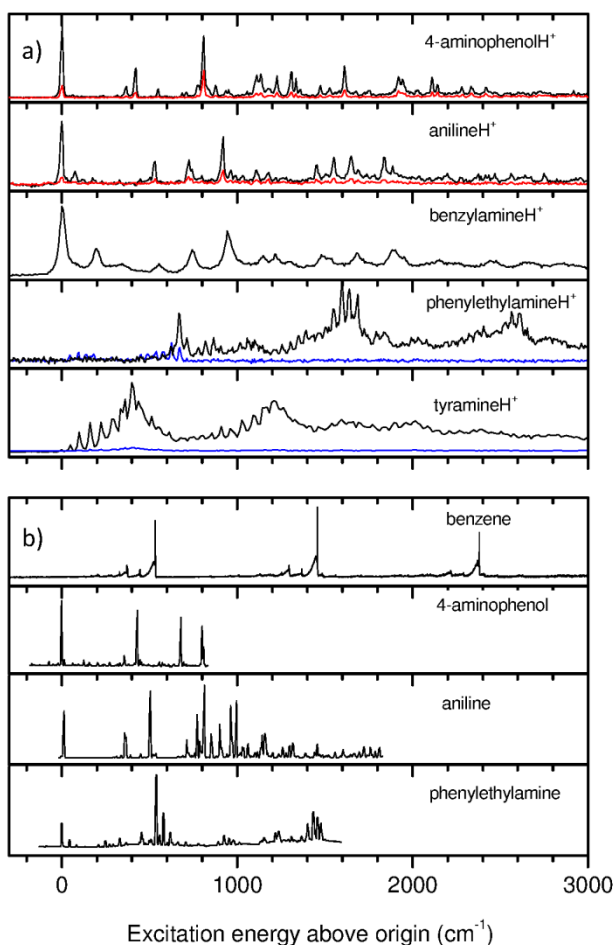

**Fig. S11** Comparison of the electronic spectra of protonated aromatic amines with that of neutral molecules. a) Photofragmentation spectra of protonated aromatic amines ( $S_1$  state) within the main fragmentation channels:  $\text{NH}_3$  loss in black,  $\text{C}\alpha\text{-C}\beta$  bond breaking in blue and H-loss in red. Photofragments are the following: for 4-aminophenol $\text{H}^+$ ,  $m/z$  93 and  $m/z$  109; for aniline $\text{H}^+$ ,  $m/z$  77 and  $m/z$  93; for benzylamine $\text{H}^+$ ,  $m/z$  91; for phenylethylamine $\text{H}^+$ ,  $m/z$  91 and 92 (blue) and  $m/z$  105 (black); for tyramine $\text{H}^+$ ,  $m/z$  108 and  $m/z$  121. b) Neutral benzene UV absorption spectrum (in a cell);<sup>1</sup> jet-cooled neutral p-aminophenol and phenylethylamine fluorescence excitation spectrum from Mori et al.<sup>2</sup> and Yamamoto et al.,<sup>3</sup> respectively; jet-cooled neutral aniline R2PI spectrum.<sup>4</sup>

The 6a mode (around  $500\text{ cm}^{-1}$ ) is active in both phenylethylamine $\text{H}^+$  and neutral phenylethylamine.

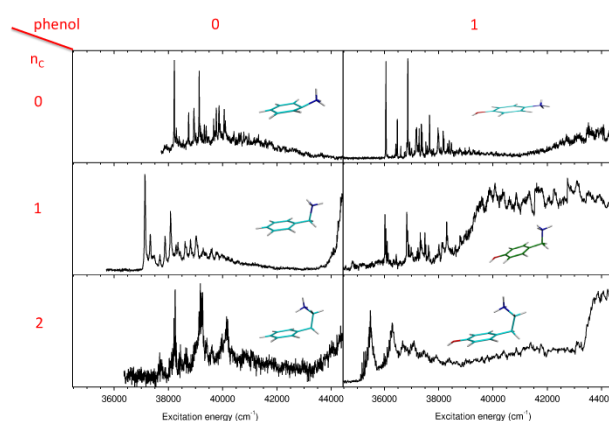

**Fig.S12** Photo-fragmentation spectra of aniline $\text{H}^+$ , benzylamine $\text{H}^+$ , phenylethylamine $\text{H}^+$ , 4-aminophenol $\text{H}^+$ , 4-hydroxybenzylamine $\text{H}^+$  and tyramine $\text{H}^+$ , in which all the fragments have been added. The absence (0) or the presence (1) of the phenol chromophore is indicated, together with the number of carbon atoms in the substituent chain (0,1 or 2).

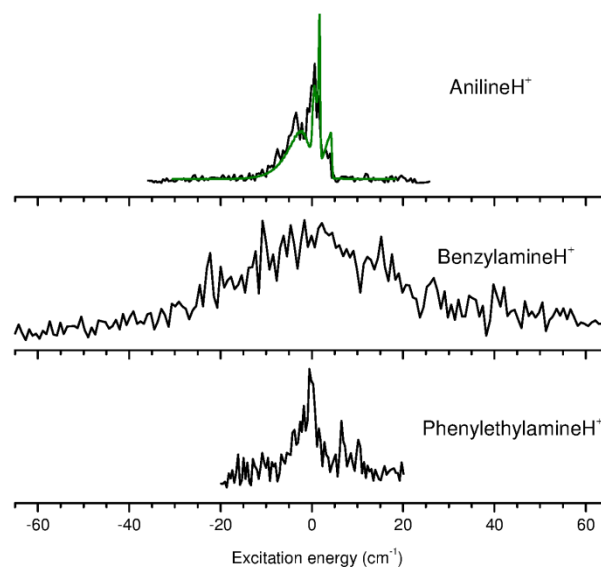

**Fig. S13** High resolution spectra (laser width  $0.2\text{ cm}^{-1}$ ) recorded on the 0-0 band of anilineH<sup>+</sup>, benzylamineH<sup>+</sup> and phenylethylamineH<sup>+</sup> recorded on NH<sub>3</sub>-loss fragments. The rotational contour for anilineH<sup>+</sup>, simulated with pgopher<sup>5</sup> at a rotational temperature of 40 K, is reproduced in green (upper panel). For benzylamineH<sup>+</sup> the band contour is very large implying a very short lifetime.

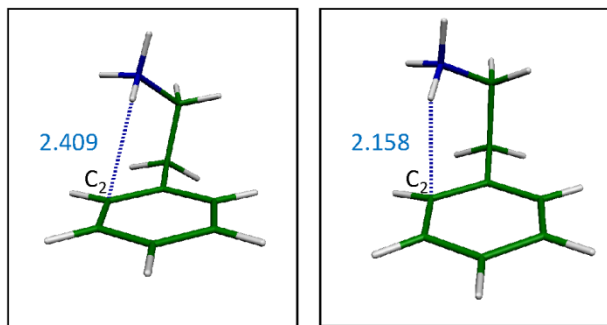

**Fig. S14** Ground state (left panel) and excited state (right panel) geometries of phenylethylamineH<sup>+</sup>. Like in tyrosineH<sup>+</sup>,<sup>6</sup> the proton pointing to the aromatic ring is much closer to the C<sub>2</sub> carbon in the excited state (distances are indicated in Å). This change of geometry in the amino chain leads to low frequency active modes in the electronic spectrum. This induces also a change in the planarity of the aromatic ring: the H atom linked to C<sub>2</sub> gets out of plane by  $10^\circ$ .

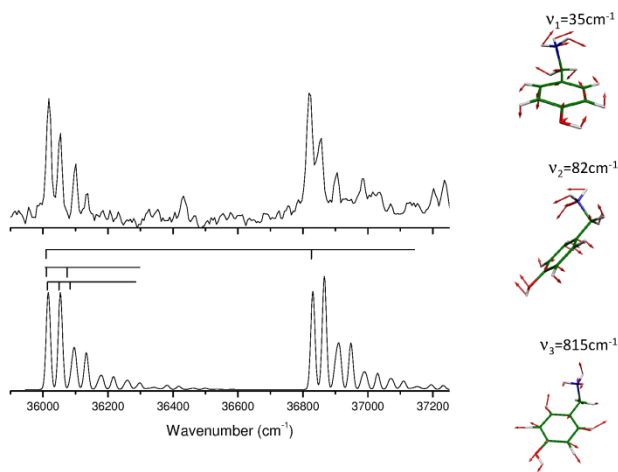

**Fig. S15** Enlarged view of the 4-hydroxybenzylamineH<sup>+</sup> spectrum (upper panel) and the calculated one (lower panel). The vibrational active modes are represented. One can note that the bands are not broad as in benzylamineH<sup>+</sup> and that, in the excited state, the CH<sub>2</sub>NH<sub>3</sub> tail is bent leading to low frequency progression well reproduced by the calculation.

**Table S11** Calculated geometries of anilineH<sup>+</sup> at the RI-MP2/aug-cc-pVTZ level of theory for the S<sub>0</sub> ground state and at the RI-CC2/aug-cc-pVTZ level for the S<sub>1</sub> excited state.

| S <sub>0</sub> |                       |                   |                   |
|----------------|-----------------------|-------------------|-------------------|
| Atom           | Cartesian Coordinates |                   |                   |
| 1 c            | 2.25340429327541      | 2.28879823484277  | -0.01635997155765 |
| 2 c            | 3.55715747143058      | 0.00161279267455  | 0.02512454876011  |
| 3 c            | 2.25067680008153      | -2.28741360997074 | -0.01557456939624 |
| 4 c            | -0.38024839674517     | -2.30994054777985 | -0.09856694012074 |
| 5 c            | -1.61655113467474     | 0.00049306404331  | -0.13778963136666 |
| 6 c            | -0.38008249464208     | 2.30751175735163  | -0.09938322996312 |
| 7 n            | -4.41951561021840     | -0.00426109823415 | -0.22780407209485 |
| 8 h            | -5.10321600171676     | 1.80311727337405  | -0.22409901208637 |
| 9 h            | -5.17201854948717     | -0.92022065157148 | 1.29991809893095  |
| 10h            | 3.27019000942064      | -4.05731981598073 | 0.01716262768857  |
| 11h            | 5.59900578961591      | 0.00050029795746  | 0.08953244840801  |
| 12h            | 3.27187019560563      | 4.05918951323264  | 0.01551440459973  |
| 13h            | -1.41169469804072     | 4.07623275611799  | -0.13206290791384 |
| 14h            | -1.41300857647498     | -4.07730503894346 | -0.13055700212432 |
| 15h            | -5.07275035530202     | -0.87685642688296 | -1.82508365819683 |
| S <sub>1</sub> |                       |                   |                   |
| Atom           | Cartesian Coordinates |                   |                   |
| 1 c            | 2.29994369493288      | 2.33780082600769  | -0.11282358350790 |
| 2 c            | 3.64208499999674      | -0.00275857813609 | -0.03831431107340 |
| 3 c            | 2.28863454779778      | -2.33636652187453 | 0.03637851515532  |
| 4 c            | -0.41699479165265     | -2.35335679946573 | 0.08104890026822  |
| 5 c            | -1.69436279331119     | 0.01219161988517  | 0.13830696227415  |
| 6 c            | -0.40042137518932     | 2.36435546005508  | -0.06808794213035 |
| 7 n            | -4.44815309695124     | -0.00264459448238 | -0.27056218297588 |
| 8 h            | -5.21683192853234     | 1.71860500515319  | 0.16809236775392  |
| 9 h            | -5.30638729324699     | -1.33056938284858 | 0.84862781110778  |
| 10h            | 3.29104982595089      | -4.11496340157583 | 0.07906909874624  |
| 11h            | 5.68282508265236      | -0.00902730743115 | -0.04108889641613 |
| 12h            | 3.30895867997147      | 4.11172735820931  | -0.17802426782599 |
| 13h            | -1.42744435061310     | 4.13470222635329  | -0.12108843618272 |
| 14h            | -1.45083826392855     | -4.11897828566400 | 0.13772865501450  |
| 15h            | -4.91884419574889     | -0.40657912395441 | -2.11929155664111 |

**Table S12** Calculated geometries of benzylamineH<sup>+</sup> at the RI-MP2/aug-cc-pVDZ level of theory for the S<sub>0</sub> ground state and at the RI-CC2/aug-cc-pVDZ level for the S<sub>1</sub> excited state.

| S <sub>0</sub> |                       |                  |                   |
|----------------|-----------------------|------------------|-------------------|
| Atom           | Cartesian Coordinates |                  |                   |
| 1 n            | -1.61950241263567     | 2.36939827357116 | 2.64066224456268  |
| 2 c            | 0.17273344474778      | 3.91462097824585 | 4.32837692818479  |
| 3 h            | 1.93801185293990      | 2.82406473469342 | 4.42690703888532  |
| 4 h            | 0.49490332927897      | 5.70362854155653 | 3.32294459009716  |
| 5 c            | -1.08178048061450     | 4.25200399936830 | 6.84815827957396  |
| 6 c            | -0.73624503013141     | 2.41909161392732 | 8.76028294509050  |
| 7 h            | 0.56949401233339      | 0.83670177297383 | 8.46683007029399  |
| 8 c            | -2.70076405287416     | 6.33681075090655 | 7.25757881031694  |
| 9 h            | -2.91878585600683     | 7.79256706343268 | 5.79872073153027  |
| 10c            | -2.02174744637712     | 2.66815140012826 | 11.07510927694817 |
| 11h            | -1.74053995929941     | 1.26594082954555 | 12.56657515491879 |
| 12c            | -3.98213303508696     | 6.57758093087002 | 9.57556957913491  |
| 13h            | -5.21799347831040     | 8.20014715720757 | 9.90671904990831  |
| 14c            | -3.64908549134787     | 4.73935836350386 | 11.47507786346373 |
| 15h            | -4.63628156618561     | 4.93661569597036 | 13.27990242216442 |
| 16h            | -1.99559462015186     | 0.65657052036498 | 3.48100162687342  |
| 17h            | -0.90521575844888     | 2.04515506551254 | 0.86088922019195  |
| 18h            | -3.31936024499524     | 3.29797639943965 | 2.46853547814916  |
| S <sub>1</sub> |                       |                  |                   |
| Atom           | Cartesian Coordinates |                  |                   |
| 1 n            | -1.62703390826668     | 2.30946026125948 | 2.49091992909918  |
| 2 c            | 0.16586782242339      | 3.90995896776812 | 4.31990150919996  |
| 3 h            | 1.91713385202865      | 2.79008114713907 | 4.38940620654318  |

|        |                   |                  |                   |
|--------|-------------------|------------------|-------------------|
| 4 h    | 0.46387420527704  | 5.68622482902814 | 3.27973320560207  |
| 5 c    | -1.05448324460082 | 4.24703032055716 | 6.79788602303394  |
| 6 c    | -0.69987793819553 | 2.41933670031856 | 8.80550582556063  |
| 7 h    | 0.65177136658038  | 0.86889601224348 | 8.55883360576687  |
| 5 8 c  | -2.69089073461707 | 6.38745563447334 | 7.28524684565247  |
| 9 h    | -2.87055077923716 | 7.88895431575181 | 5.86930462989348  |
| 10c    | -2.02714297913603 | 2.67555535427997 | 11.17382990888117 |
| 11h    | -1.71784990753883 | 1.25976109543861 | 12.64678800962880 |
| 12c    | -4.00752103084758 | 6.62246448478057 | 9.66168532936328  |
| 10 13h | -5.23040360645960 | 8.26028412711845 | 9.96473377724603  |
| 14c    | -3.71580706489384 | 4.75467392945031 | 11.60831468041835 |
| 15h    | -4.73033650422084 | 4.93039990663816 | 13.39566497491300 |
| 16h    | -1.99885649312505 | 0.57725819703623 | 3.29054927762282  |
| 17h    | -0.85002324902728 | 2.02295774780876 | 0.72592319413534  |
| 15 18h | -3.32775659930894 | 3.22563106012808 | 2.27561437772794  |

**Table SI3** Calculated geometries of phenylethylamineH<sup>+</sup> at the RI-MP2/aug-cc-pVDZ level of theory for the S<sub>0</sub> ground state and at the RI-CC2/aug-cc-pVDZ level for the S<sub>1</sub> excited state.

| S <sub>0</sub>    |                       |                   |                   |
|-------------------|-----------------------|-------------------|-------------------|
| Atom              | Cartesian Coordinates |                   |                   |
| 1 n               | 4.09196154547150      | 3.30773720170521  | 2.18624907619821  |
| 2 h               | 5.44797414797081      | 2.87868056640190  | 3.50740269152286  |
| 25 3 c            | 1.78138314564319      | 4.48849443234733  | 3.40383724073929  |
| 4 h               | 0.63934043158229      | 5.24213255947255  | 1.84292172018172  |
| 5 c               | 0.34977791579022      | 2.41485268856248  | 4.84528645375197  |
| 6 h               | 1.43941799993800      | 1.82330558881111  | 6.52173265271666  |
| 7 h               | -1.43347719079805     | 3.24627744656219  | 5.52603338253308  |
| 30 8 c            | -0.11577241531605     | 0.19306562132030  | 3.09886688416186  |
| 9 c               | -1.98332014614766     | 0.34600503647422  | 1.19567356828859  |
| 10h               | -3.23509069558900     | 1.99348915376756  | 1.10644710384136  |
| 11c               | 1.44525834238791      | -1.97338573942188 | 3.22082412143543  |
| 12h               | 2.84208313750314      | -2.15213137241153 | 4.74248380846903  |
| 35 13c            | -2.28847172114997     | -1.63687853200392 | -0.54725103095993 |
| 14h               | -3.75936300779438     | -1.51648996981681 | -1.99351761206638 |
| 15c               | 1.14480695807528      | -3.95729220741565 | 1.46885464377528  |
| 16h               | 2.33967177655887      | -5.63815134617870 | 1.59935071782034  |
| 17c               | -0.71571379982042     | -3.78190101938003 | -0.42176623086368 |
| 40 18h            | -0.96178953291806     | -5.32341013219757 | -1.77485922418402 |
| 19h               | 2.43881973140846      | 6.04489393459633  | 4.61024469738701  |
| 20h               | 4.89981396176496      | 4.45076130710195  | 0.84427390856757  |
| 21h               | 3.53784452453049      | 1.61584614017780  | 1.36055510957134  |
| 45 S <sub>1</sub> |                       |                   |                   |
| Atom              | Cartesian Coordinates |                   |                   |
| 1 n               | 4.27290243596910      | 3.22611794104176  | 2.41249710375578  |
| 2 h               | 5.56552824571205      | 3.10220541654986  | 3.85723229689466  |
| 50 3 c            | 1.83875751893270      | 4.46918961413929  | 3.29620505591790  |
| 4 h               | 0.83567519516260      | 5.06432880140087  | 1.57790726455940  |
| 5 c               | 0.28741247040579      | 2.49711298852180  | 4.77506352692578  |
| 6 h               | 1.30233395054672      | 1.95277965198220  | 6.51830382304229  |
| 7 h               | -1.49615690939305     | 3.41783694923153  | 5.34032638462191  |
| 55 8 c            | -0.19117732204173     | 0.24253631532882  | 3.11640295498623  |
| 9 c               | -2.25801336476864     | 0.27708744413534  | 1.32415209860747  |
| 10h               | -3.63953085608036     | 1.81620526621271  | 1.40688469929207  |
| 11c               | 1.62666444590297      | -1.82103141901748 | 3.06177832046291  |
| 12h               | 2.96804359135505      | -2.04271911209865 | 4.62790229128788  |
| 60 13c            | -2.53226705425733     | -1.70774681452201 | -0.51850298859040 |
| 14h               | -4.09456214796071     | -1.66307581685565 | -1.86681995827400 |
| 15c               | 1.28317371096773      | -3.85851847997565 | 1.27298125499576  |
| 16h               | 2.56681507966227      | -5.47735006225252 | 1.30183306245386  |
| 17c               | -0.76632986494380     | -3.77939495890215 | -0.51976567372668 |
| 65 18h            | -0.99513735821984     | -5.32869119406638 | -1.86651089326804 |
| 19h               | 2.35722340520502      | 6.13366127383248  | 4.42844396919473  |
| 20h               | 5.11245706195588      | 4.17624957567726  | 0.94170260496287  |
| 21 h              | 3.86134287497912      | 1.36911797811141  | 1.85562648478516  |

70

**Table S14** Calculated geometries of 4-aminophenolH<sup>+</sup> at the RI-MP2/aug-cc-pVDZ level of theory for the S<sub>0</sub> ground state and at the RI-CC2/aug-cc-pVDZ level for the S<sub>1</sub> excited state. The excited state convergence using TD/DFT(B3LYP) cannot be obtained due to a direct H loss from NH<sub>3</sub> in the optimization process.

| S <sub>0</sub> |                       |                   |                   |
|----------------|-----------------------|-------------------|-------------------|
| Atom           | Cartesian Coordinates |                   |                   |
| 1 c            | -1.28889455845802     | 3.47999447181847  | 6.91927312158507  |
| 2 c            | -0.36942814205593     | 2.96220296280968  | 9.35584670691975  |
| 3 c            | 1.81558221195882      | 1.46558649879313  | 9.66384174511225  |
| 4 c            | 3.08791626408473      | 0.48191810841660  | 7.53255634635631  |
| 5 c            | 2.18648005222016      | 0.98715457037795  | 5.09607962599144  |
| 6 c            | 0.01147903688562      | 2.47970284082821  | 4.84710774417253  |
| 7 n            | -0.95108946887153     | 3.01975683206583  | 2.25866153987762  |
| 8 h            | -2.98458268077796     | 4.64161325942661  | 6.68160312303248  |
| 9 o            | 2.82399004239193      | 0.87909049751559  | 11.95037011094661 |
| 10h            | 3.17406354476545      | 0.22364298682595  | 3.44636040088161  |
| 11h            | -1.35834962845831     | 3.72642237410675  | 11.00263326614457 |
| 12h            | 4.77588892423840      | -0.67179620717469 | 7.81935414846839  |
| 13h            | -2.54590323619501     | 4.12721879913185  | 2.33817219154150  |
| 14h            | 0.36369763723353      | 3.97037439668954  | 1.18602353175433  |
| 15h            | -1.42328110597856     | 1.38785173229485  | 1.31166976442365  |
| 16h            | 1.83913687843673      | 1.62616278164812  | 13.30402669729650 |

| 70 Atom Cartesian Coordinates |                   |                  |                   |
|-------------------------------|-------------------|------------------|-------------------|
| 1 c                           | -3.68137586743445 | 4.73885906282091 | 11.43481911851374 |
| 2 c                           | -2.21129197732777 | 2.52319477568144 | 10.94632093758854 |
| 3 c                           | -0.90215890200408 | 2.32540995882840 | 8.54991437719433  |
| 4 c                           | -1.12772952780665 | 4.39129713179614 | 6.79196796951171  |
| 5 c                           | -2.64022991847222 | 6.58656904616234 | 7.30114846908455  |
| 6 c                           | -3.91800941443674 | 6.80671073566903 | 9.67105980848750  |
| 7 c                           | 0.07364585577224  | 4.08223259466927 | 4.25448577361149  |
| 8 n                           | -1.49512457579941 | 2.14538774774705 | 2.77379746236850  |
| 9 h                           | 1.98847514752605  | 3.26973569882822 | 4.37004718441480  |
| 10h                           | 0.10486943318237  | 5.82227503108369 | 3.11850048725424  |
| 11h                           | 0.48767102094815  | 0.82053353898574 | 8.23496152611485  |
| 12h                           | -2.77527972630321 | 8.09460996683220 | 5.89004234037520  |
| 13h                           | -2.09477427975316 | 1.05652727443133 | 12.39513341070434 |
| 14h                           | -5.06232564618133 | 8.46756797987216 | 10.12763037119163 |
| 15o                           | -4.84913803979023 | 4.80066418874641 | 13.69850740440585 |
| 16h                           | -1.72997214575806 | 0.55886406480722 | 3.89051757413654  |
| 17h                           | -0.69326171137430 | 1.61681161185226 | 1.07713020373472  |
| 18h                           | -3.27804422895088 | 2.84922805233836 | 2.42384673304535  |
| 19h                           | -5.74908697726142 | 6.40823289723058 | 13.85014811896412 |

| 25 S <sub>1</sub> |                       |                   |                   |
|-------------------|-----------------------|-------------------|-------------------|
| Atom              | Cartesian Coordinates |                   |                   |
| 1 c               | -1.37550984432701     | 3.49343498941248  | 6.93227794333359  |
| 2 c               | -0.46135825750700     | 2.94935674939409  | 9.42942172073260  |
| 3 c               | 1.82406806053366      | 1.46515315484984  | 9.62602424449661  |
| 4 c               | 3.22289820209720      | 0.50079233885689  | 7.51796486386121  |
| 5 c               | 2.30712342437957      | 1.07053451831857  | 5.00813022271062  |
| 6 c               | 0.04710771525516      | 2.51026050842976  | 4.86831576290397  |
| 7 n               | -0.96641967719129     | 2.99555606766861  | 2.29609887045672  |
| 8 h               | -3.10149781918158     | 4.58819031763476  | 6.62428021592733  |
| 9 o               | 2.79485329291435      | 0.87502167633261  | 11.91491243039964 |
| 10h               | 3.27355594061485      | 0.38909789389072  | 3.31427372514243  |
| 11h               | -1.44402448258681     | 3.62840370807528  | 11.11433851864268 |
| 12h               | 4.92038146911395      | -0.62346967262901 | 7.84768645381514  |
| 13h               | -2.17193931718484     | 4.52460941349810  | 2.29617874525654  |
| 14h               | 0.48838655679552      | 3.37673334552073  | 1.05360165502264  |
| 15h               | -1.93963902701195     | 1.44967301777040  | 1.61386361051059  |
| 16h               | 1.73871953470628      | 1.59354887855066  | 13.25621108129224 |

**Table S15** Calculated geometries of 4-hydroxybenzylamineH<sup>+</sup> at the RI-MP2/aug-cc-pVDZ level of theory for the S<sub>0</sub> ground state and at the RI-CC2/aug-cc-pVDZ level for the S<sub>1</sub> excited state.

| S <sub>0</sub> |                       |                  |                   |
|----------------|-----------------------|------------------|-------------------|
| Atom           | Cartesian Coordinates |                  |                   |
| 1 c            | -3.66798302969689     | 4.78063613866877 | 11.49174609639579 |
| 2 c            | -2.06639307509423     | 2.68979000966459 | 11.06354789991947 |
| 3 c            | -0.80956971233411     | 2.43455099605624 | 8.75577873683648  |
| 4 c            | -1.12848288947733     | 4.25815008871764 | 6.83085269959361  |
| 5 c            | -2.72073989065154     | 6.34960819196221 | 7.26839085898549  |
| 6 c            | -3.98109116845262     | 6.61417791953956 | 9.58121214751079  |
| 7 c            | 0.13947328340350      | 3.92350396126623 | 4.32764520836040  |
| 8 n            | -1.56618582658342     | 2.33390108691482 | 2.61269673881717  |
| 9 h            | 1.93585461923907      | 2.88323386888820 | 4.45097272322101  |
| 10h            | 0.44420614629827      | 5.71439136892200 | 3.31622506987901  |
| 11h            | 0.46985297615882      | 0.82699384482144 | 8.47643471868178  |
| 12h            | -2.94931848665648     | 7.81609890524511 | 5.82121467717481  |
| 13h            | -1.81648615845312     | 1.30840731349095 | 12.58050521962346 |
| 14h            | -5.19151915140948     | 8.26169375262301 | 9.91125795900516  |
| 15o            | -4.81042148300443     | 4.90066143448792 | 13.77060815349877 |
| 16h            | -1.92336175345598     | 0.60845575309463 | 3.44249881793568  |
| 17h            | -0.80843807164977     | 2.01687805702793 | 0.84510956216888  |
| 18h            | -3.29143663938457     | 3.20965870984812 | 2.39091216528796  |
| 19h            | -5.8110117002075      | 6.43391995714332 | 13.86236981780640 |

| S <sub>1</sub> |  |  |  |
|----------------|--|--|--|
|----------------|--|--|--|

**Table S16** Calculated geometries of protonated tyramine at the RI-MP2/aug-cc-pVDZ level of theory for the  $S_0$  ground state and at the RI-CC2/aug-cc-pVDZ level for the  $S_1$  excited state.

| $S_0$   |                       |                   |                   |
|---------|-----------------------|-------------------|-------------------|
| Atom    | Cartesian Coordinates |                   |                   |
| 1 n     | 0.01216466828741      | 0.23474314195663  | -0.53914974730923 |
| 2 h     | -0.38185924910067     | 0.08418319524903  | 1.35552682147070  |
| 3 c     | 2.82268451115484      | 0.00432489901843  | -1.04624585895560 |
| 4 h     | 3.011814444466542     | -0.24529444504832 | -3.09817210419830 |
| 5 c     | 4.10407656996063      | 2.45818487342773  | -0.16785440374750 |
| 6 h     | 4.07410268863763      | 2.57435090388318  | 1.91395036277283  |
| 7 h     | 6.10021001030216      | 2.36308978649519  | -0.75159525065216 |
| 8 c     | 2.76401316310590      | 4.70632190248750  | -1.32612487564618 |
| 9 c     | 3.14134503237206      | 5.34288719816380  | -3.89107455117354 |
| 10 h    | 4.55426043419343      | 4.32860262767653  | -5.01463556258658 |
| 11 c    | 0.96421155305148      | 6.09710934750123  | 0.08184723244093  |
| 12 h    | 0.70574556626502      | 5.70395517468635  | 2.10088261184638  |
| 13 c    | 1.77010018836949      | 7.31477157387805  | -5.02047919192399 |
| 14 h    | 2.10990125691883      | 7.80720865861858  | -7.00138213348955 |
| 15 c    | -0.42673675308683     | 8.06686722207221  | -1.03090898255904 |
| 16 h    | -1.79059486751350     | 9.17009017960276  | 0.05966551845736  |
| 17 c    | -0.02744969575862     | 8.67394104252608  | -3.59264238203403 |
| 18 o    | -1.44003247053953     | 10.60465856504418 | -4.55478019042940 |
| 19 h    | -0.96942547243569     | 10.92548530895552 | -6.29627793260960 |
| 20 h    | 3.49945871954216      | -1.69538282290070 | -0.06463626079240 |
| 21 h    | -1.03576914553281     | -1.09790986754925 | -1.47969382683512 |
| 22 h    | -0.54406633369035     | 2.03260282164137  | -1.10278635576710 |
| $S_1$   |                       |                   |                   |
| Atom    | Cartesian Coordinates |                   |                   |
| 30 1 n  | 0.00906448679843      | 0.18822527508278  | -0.17431027015609 |
| 2 h     | -0.13774069821067     | -0.26048028915440 | 1.71030205675956  |
| 3 c     | 2.72758502166955      | 0.04090428029438  | -1.07803463947828 |
| 4 h     | 2.64429931693832      | -0.13727641319063 | -3.14554507818095 |
| 5 c     | 4.11515547204739      | 2.48526615535123  | -0.31098857690157 |
| 35 6 h  | 4.20520657837443      | 2.63452921878661  | 1.77050112744307  |
| 7 h     | 6.06423338382723      | 2.34515455087179  | -1.03219743486081 |
| 8 c     | 2.73967998686751      | 4.70595153590927  | -1.43872047710035 |
| 9 c     | 3.36781629450946      | 5.53264670585965  | -3.93287311087235 |
| 10 h    | 4.95922741773264      | 4.63988953594322  | -4.90973742700039 |
| 40 11 c | 0.54991048416270      | 5.68462712538389  | -0.08561372902761 |
| 12 h    | 0.45808564686185      | 5.39855393371771  | 1.96870830752384  |
| 13 c    | 1.92121027887568      | 7.43440228178440  | -5.16819782550932 |
| 14 h    | 2.30687896196225      | 8.03948113142723  | -7.10596801711527 |
| 15 c    | -0.64612338074073     | 7.90040834373807  | -1.14833874970930 |
| 45 16 h | -2.00758531820586     | 9.04131687968128  | -0.09336774359673 |
| 17 c    | -0.00686232257541     | 8.64128990849358  | -3.66853293125102 |
| 18 o    | -1.32289750380973     | 10.64113705325885 | -4.56901165650275 |
| 19 h    | -0.72689300857098     | 11.06088635209705 | -6.27059266102933 |
| 20 h    | 3.59019612831398      | -1.66324586368545 | -0.25929892583943 |
| 50 21 h | -1.17268719658502     | -0.99882559632523 | -1.15887381449479 |
| 22 h    | -0.61960521107463     | 2.09994918206078  | -0.36587548682146 |

## Notes and references

- <sup>a</sup> PIIM, Aix-Marseille Université, CNRS UMR 7345, Avenue Escadrille  
Normandie-Niemen, 13397 Marseille Cedex 20, France
- <sup>b</sup> Institut des Sciences Moléculaires d'Orsay, CNRS UMR 8214,  
Université Paris Sud 11, 91405 Orsay Cedex, France
- <sup>c</sup> CLUPS (Centre Laser de l'Université Paris-Sud/LUMAT FR 2764),  
Bâtiment 106, Université Paris Sud 11, 91405 Orsay Cedex, France
- <sup>d</sup> Laboratoire de Physique des Lasers, Université Paris 13, Sorbonne  
Paris Cité, CNRS UMR 7538, 93430 Villetaneuse, France
- \* Corresponding Author: christophe.jouvet@univ-amu.fr

† Electronic Supplementary Information (ESI) available: [details of any  
supplementary information available should be included here]. See  
DOI: 10.1039/b000000x/

1. S. Fally, M. Carleer, and A. C. Vandaele, *J. Quant. Spectrosc. Radiat. Transfer*, 2009, **110**, 766–782.

2. H. Mori, H. Kugisaki, Y. Inokuchi, N. Nishi, E. Miyoshi, K. Sakota, K. Ohashi, and H. Sekiya, *Chem. Phys.*, 2002, **277**, 105–115.
3. S. Yamamoto, T. Niwa, and M. Ito, *Laser Chem.*, 1990, **10**, 169–175.
4. J. Yeh, T. Shen, D. G. Nocera, G. E. Leroi, and E. Lansing, *J. Phys. Chem.*, 1996, **100**, 4385–4389.
5. C. M. Western, *PGOPHER, a Program for Simulating Rotational Structure*, University of Bristol; available at <http://pgopher.chm.bris.ac.uk>.
6. G. Grégoire, C. Jouvet, C. Dedonder, and A. L. Sobolewski, *J. Am. Chem. Soc.*, 2007, **129**, 6223–6231.
